# Supplementary material for: Genetic variation associated with human longevity and Alzheimer’s disease risk act through microglia and oligodendrocyte cross-talk
Source: Research Square preprint supplement (doi:10.21203/rs.3.rs-2752922/v1), 2023-04-06

# Longevity\_Fairfax\_IFN

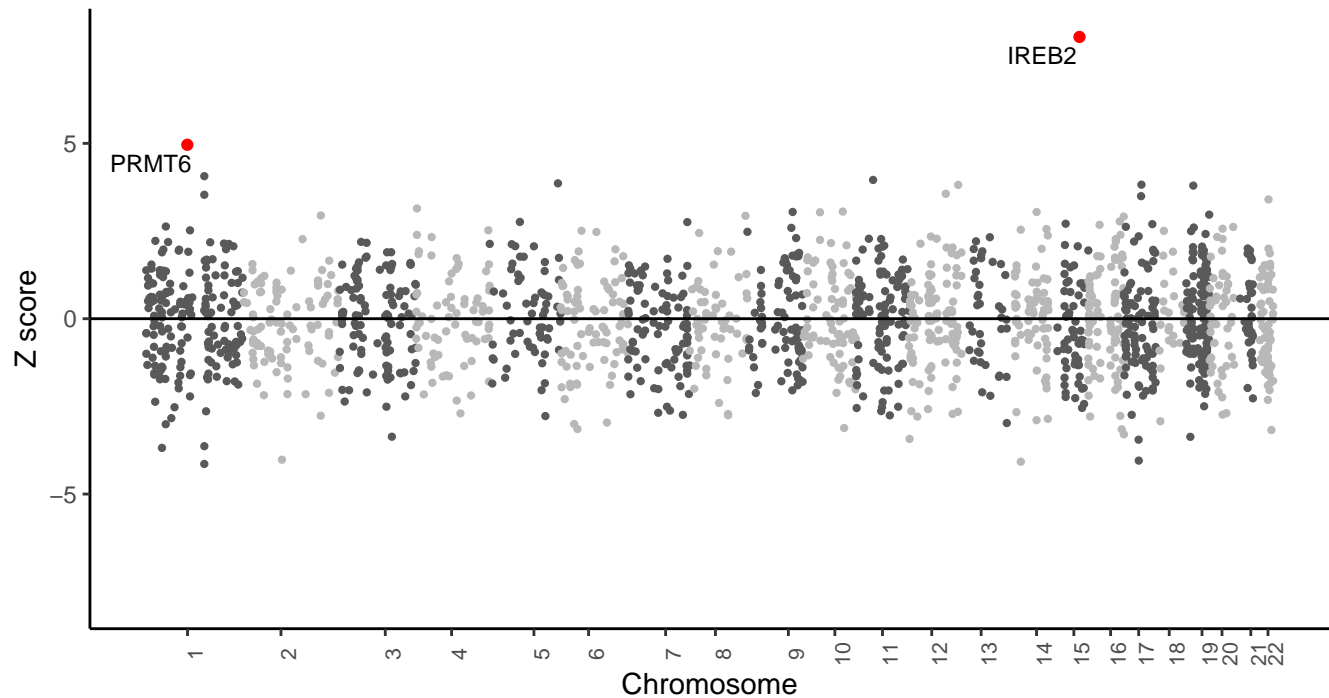

# Longevity\_Fairfax\_LPS2

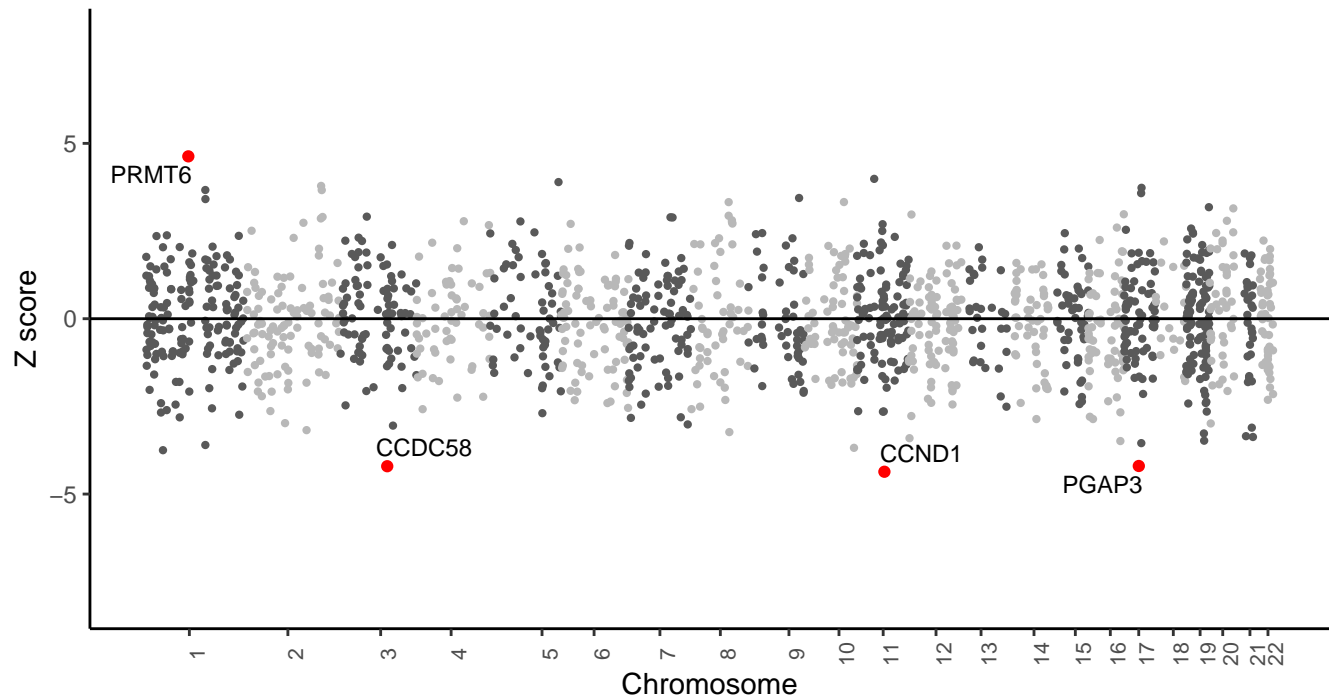

# Longevity\_Fairfax\_LPS24

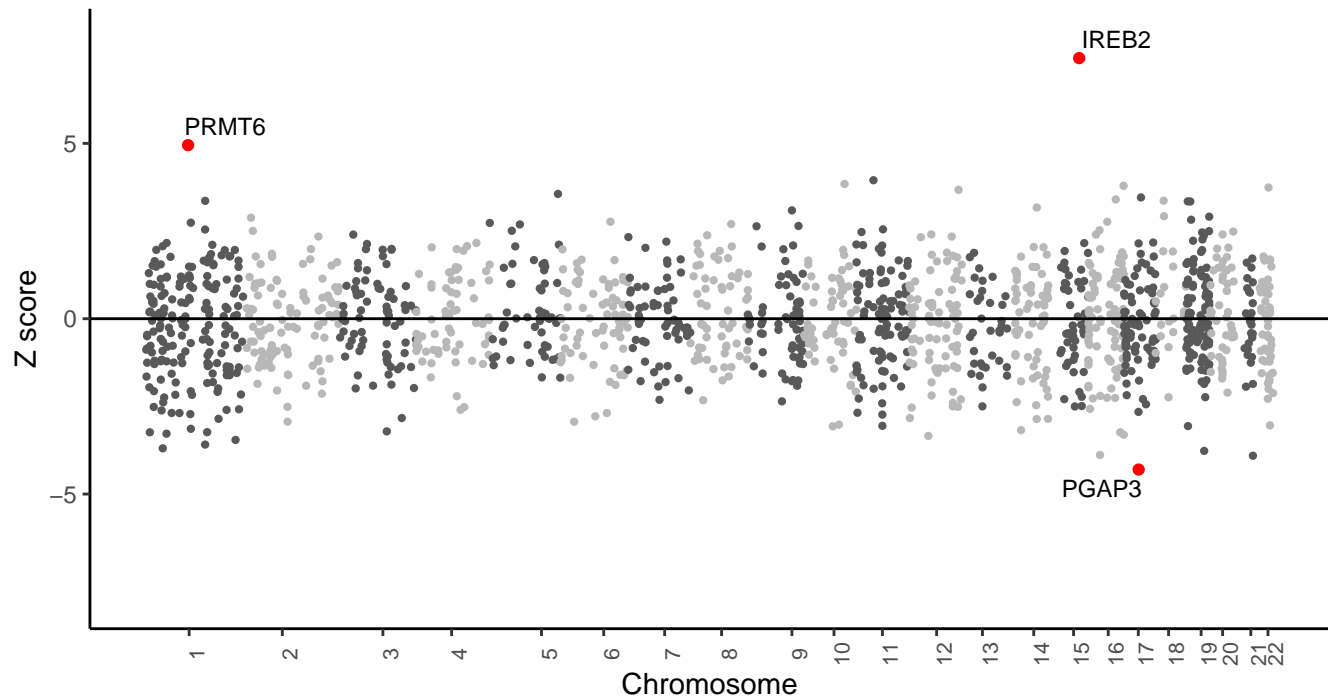

# LONGEVITY\_NTR.BLOOD.RNAARR

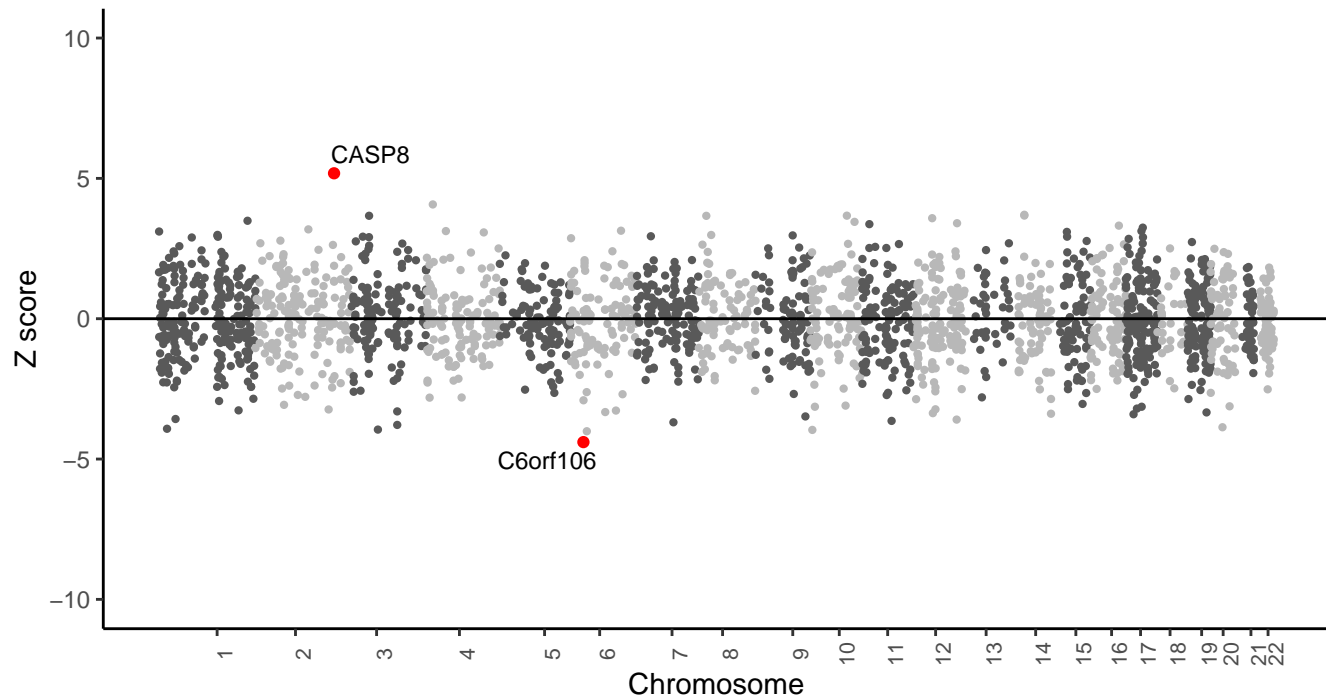

# LONGEVITY\_Whole\_Blood

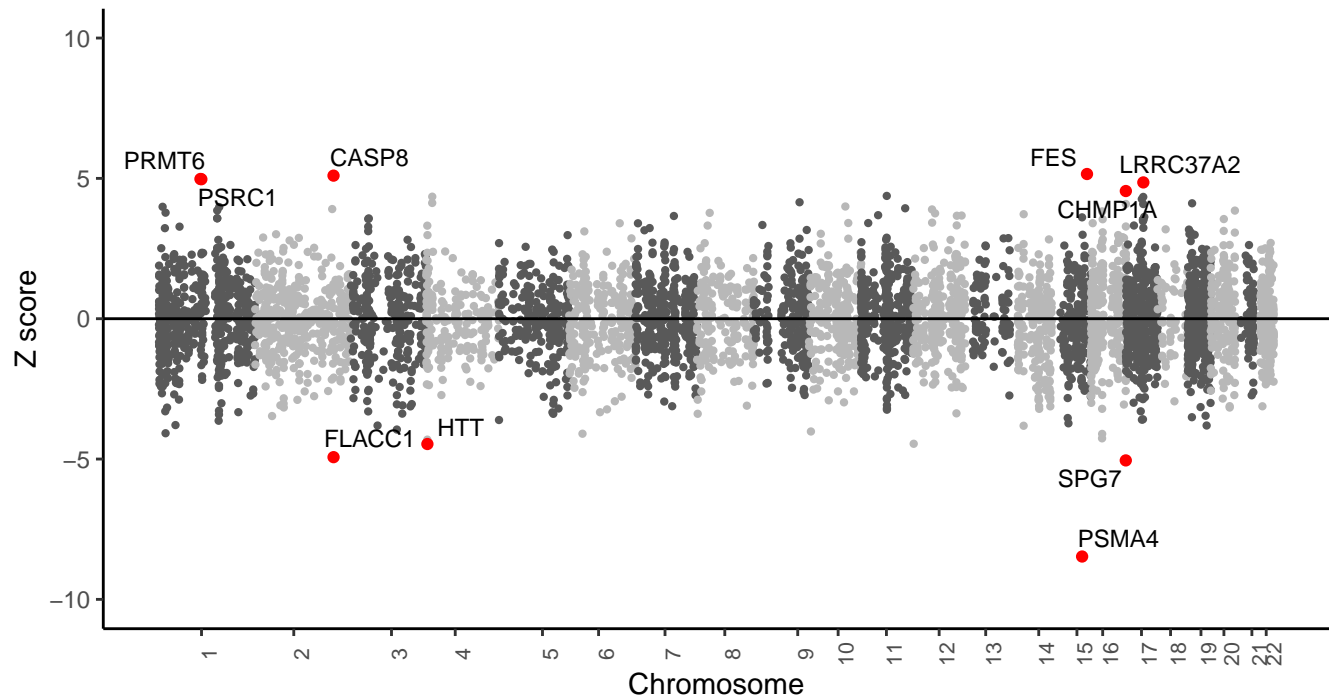

# LONGEVITY\_YFS.BLOOD.RNAARR

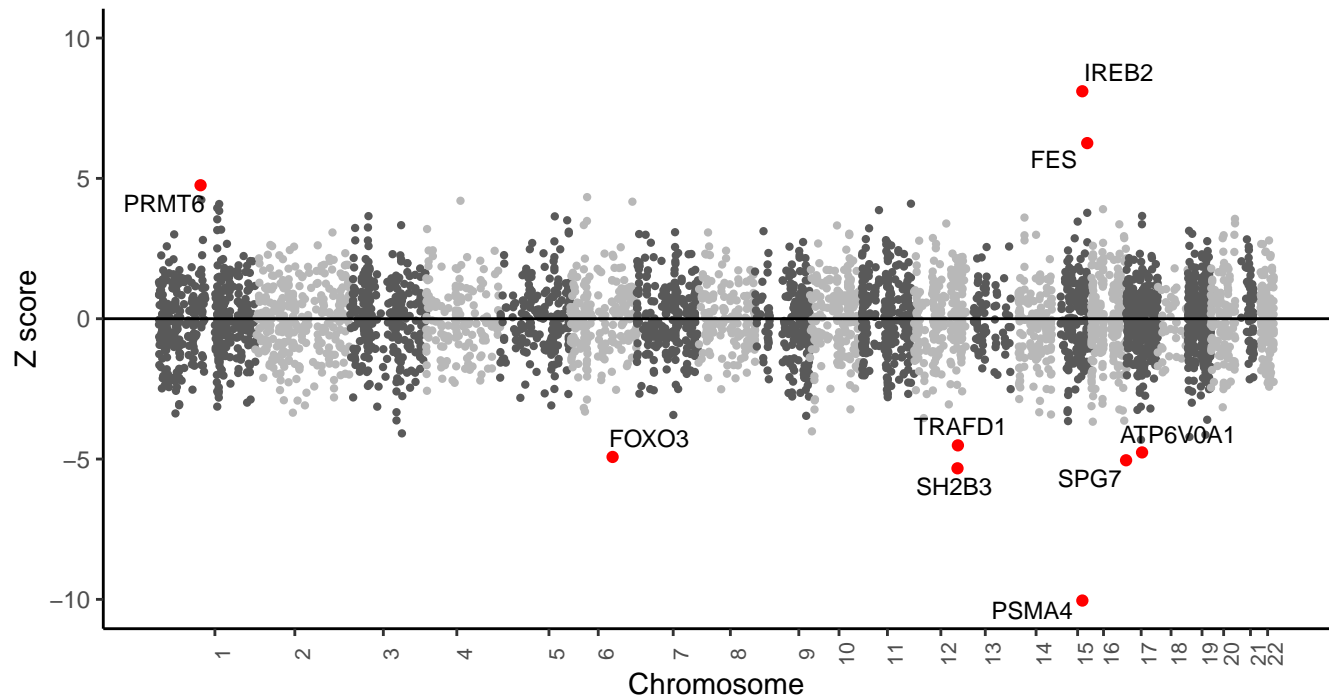

# Longevity\_Brain\_Amygdala

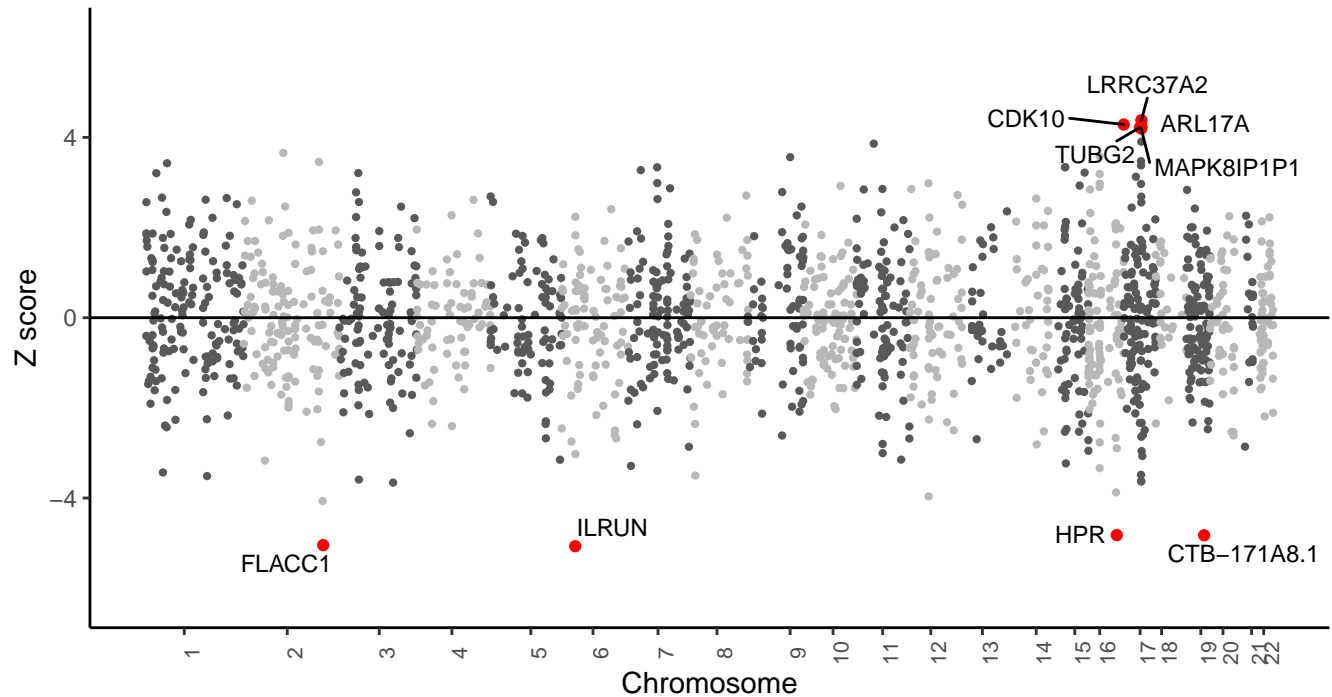

# Longevity\_Brain\_Anterior\_cingulate\_cortex\_BA24

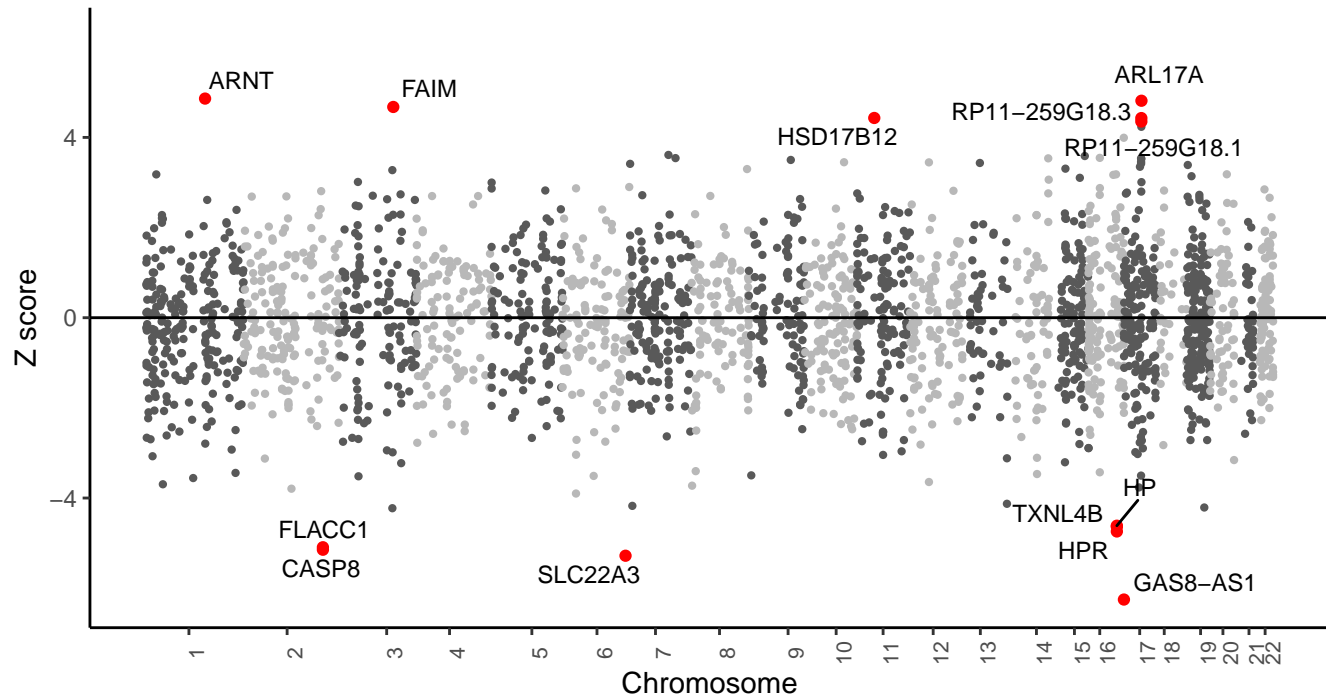



# Longevity\_Brain\_Caudate\_basal\_ganglia

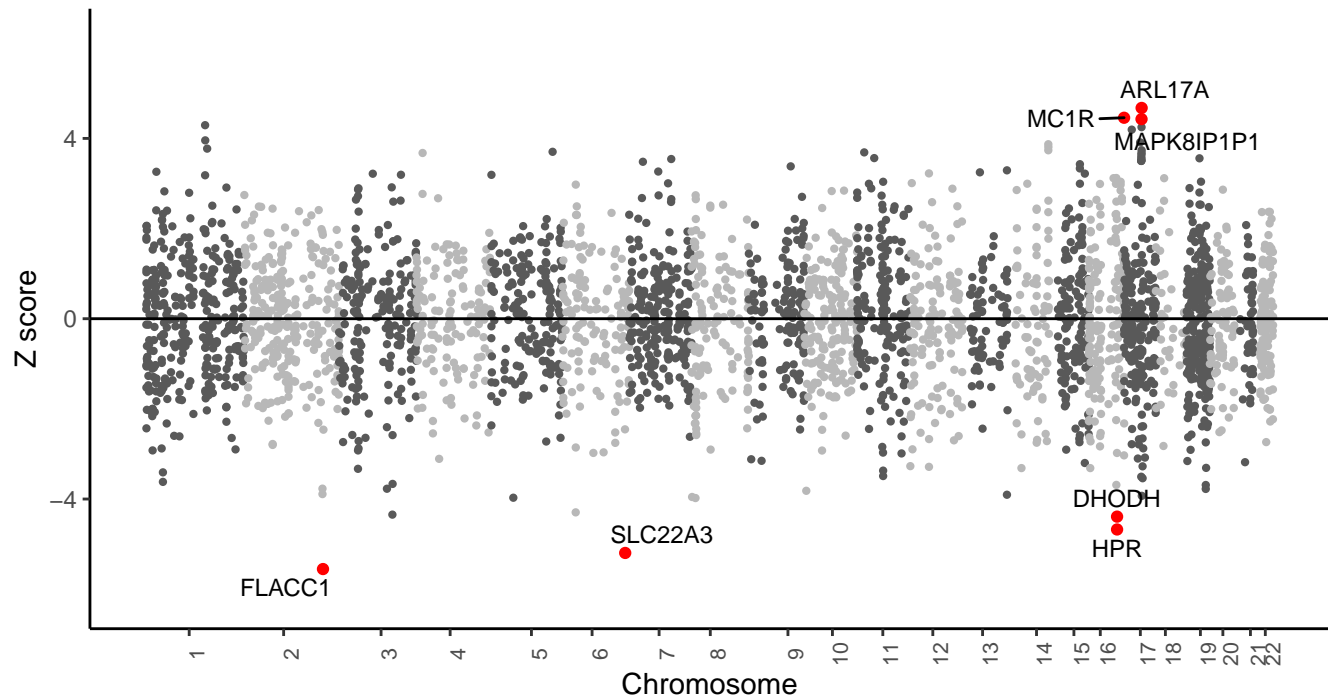

# Longevity\_Brain\_Cerebellar\_Hemisphere

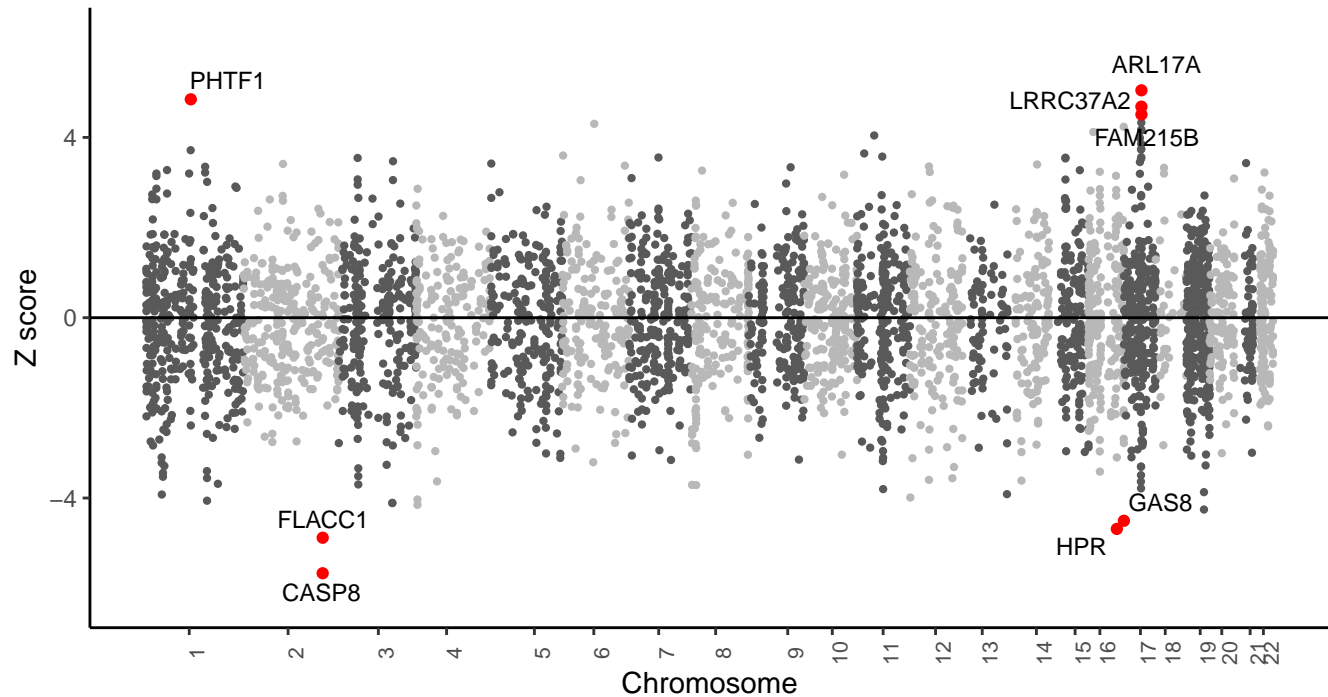

# Longevity\_Brain\_Cerebellum

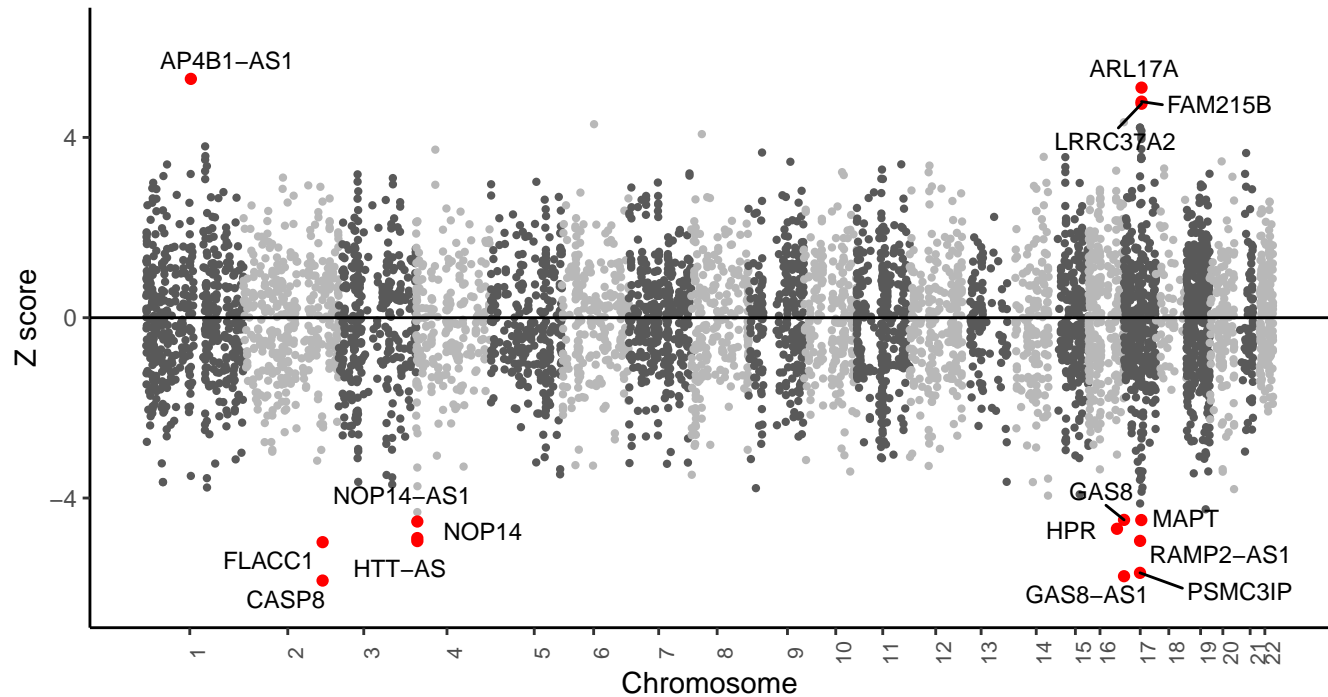

# Longevity\_Brain\_Cortex

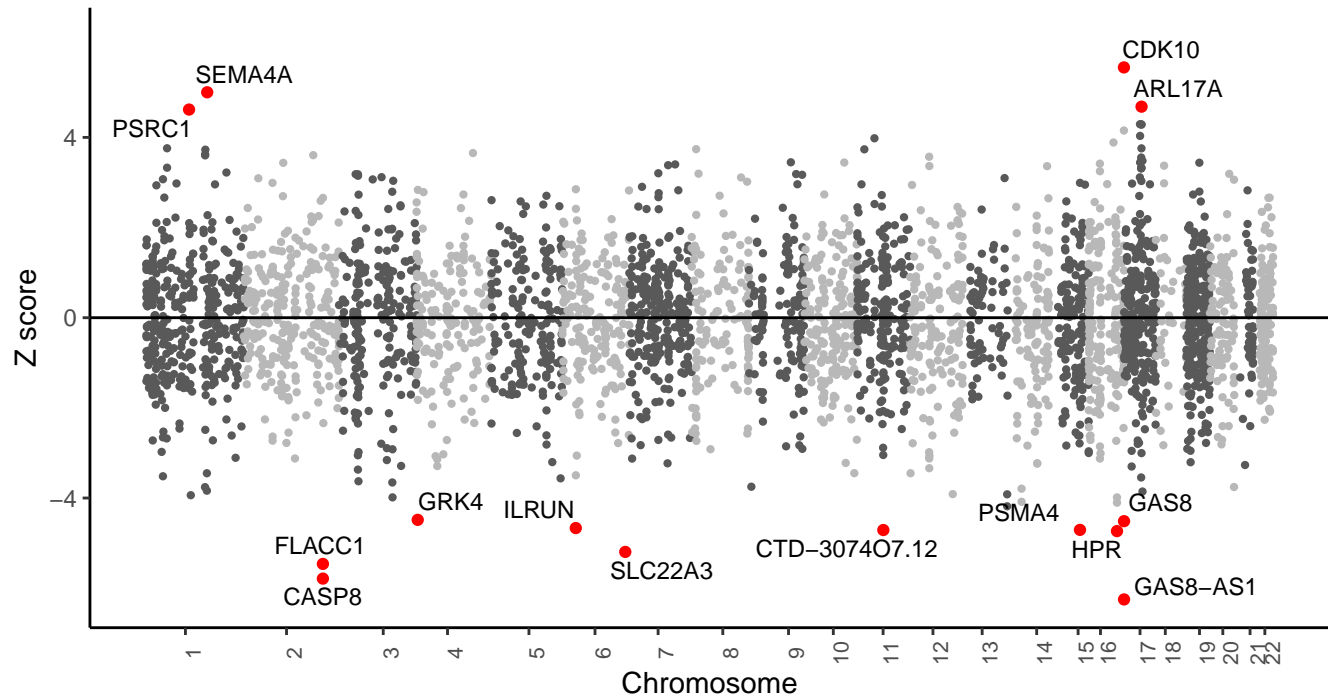

# Longevity\_Brain\_Frontal\_Cortex\_BA9

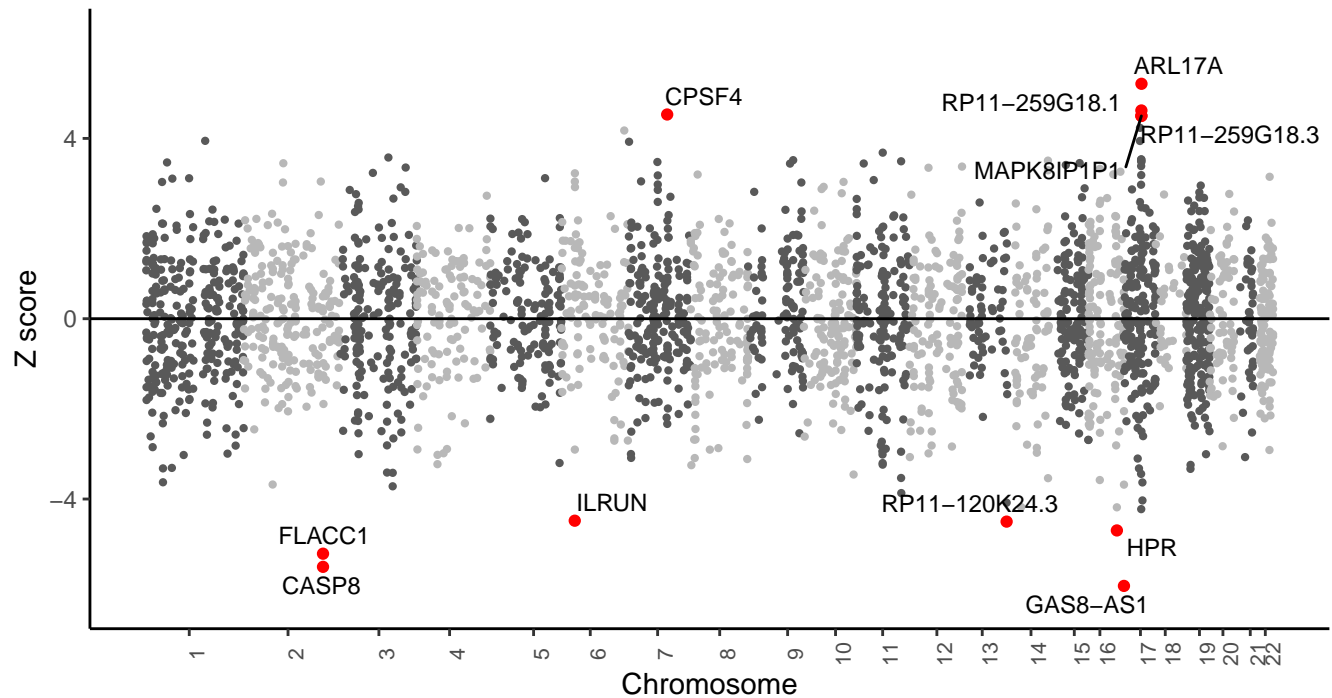

# Longevity\_Brain\_Hippocampus

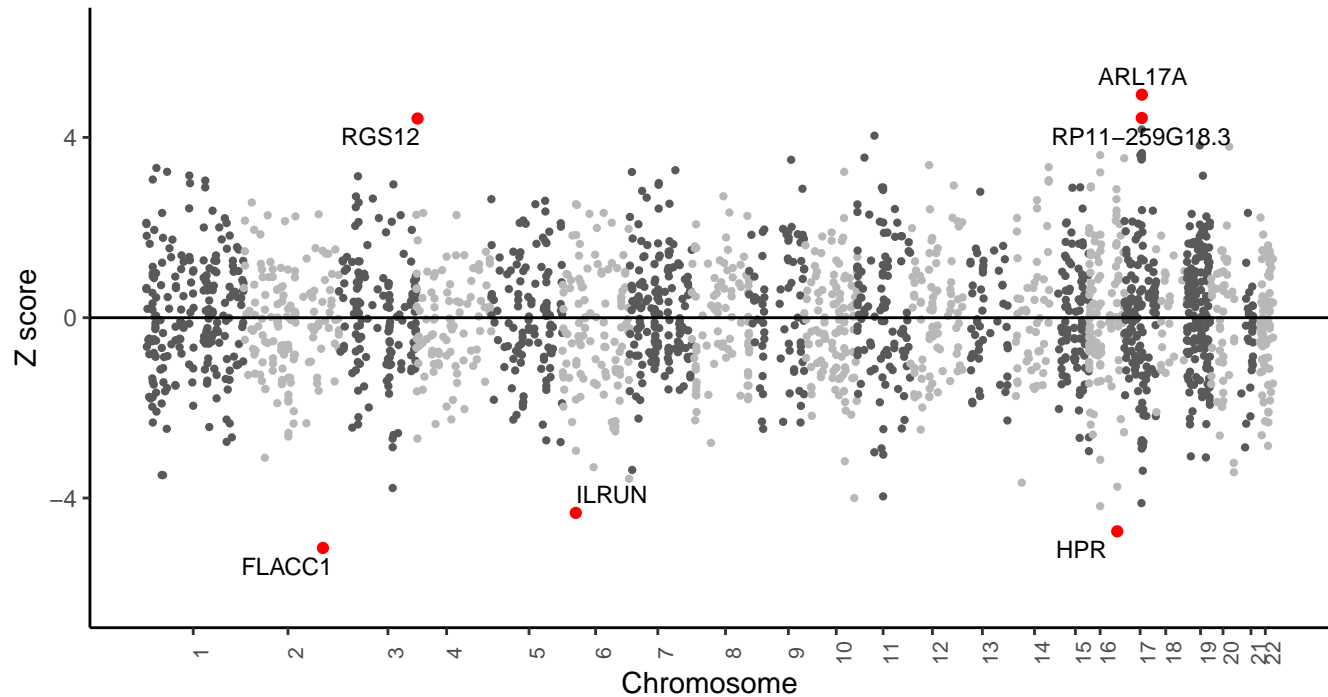

# Longevity\_Brain\_Hypothalamus

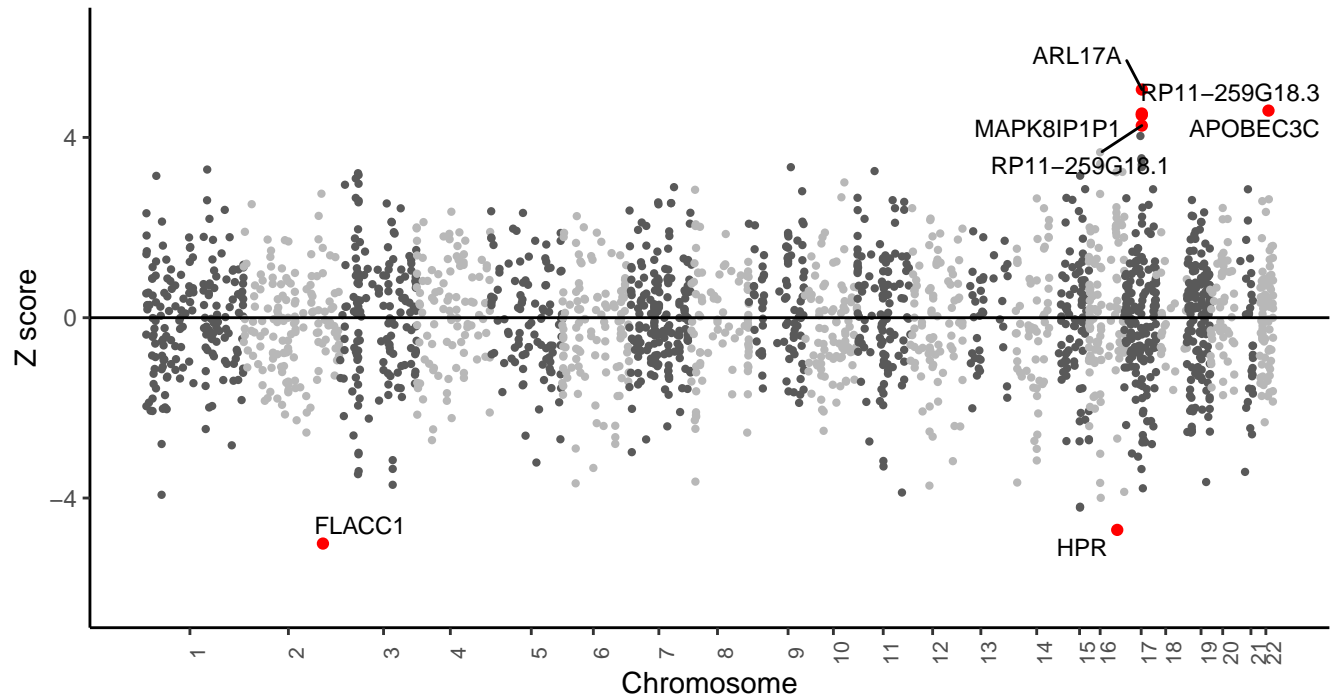

# Longevity\_Brain\_Nucleus\_accumbens\_basal\_ganglia

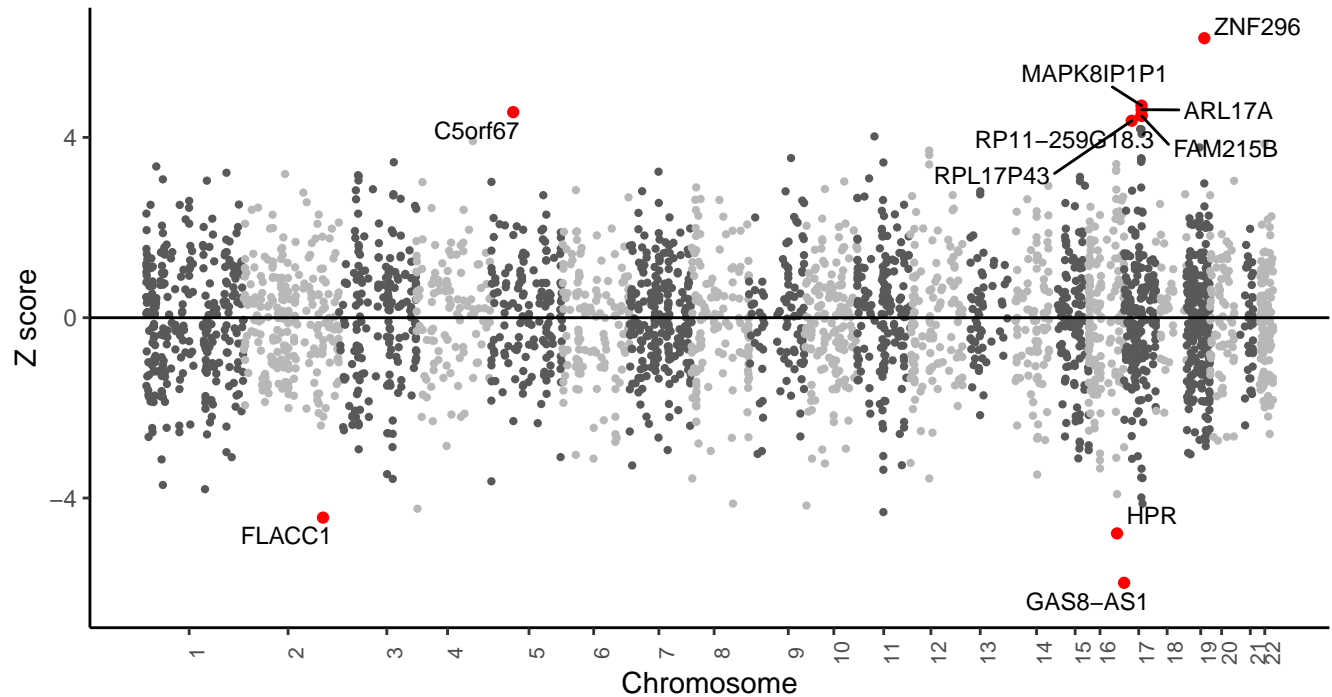



# Longevity\_Brain\_Putamen\_basal\_ganglia

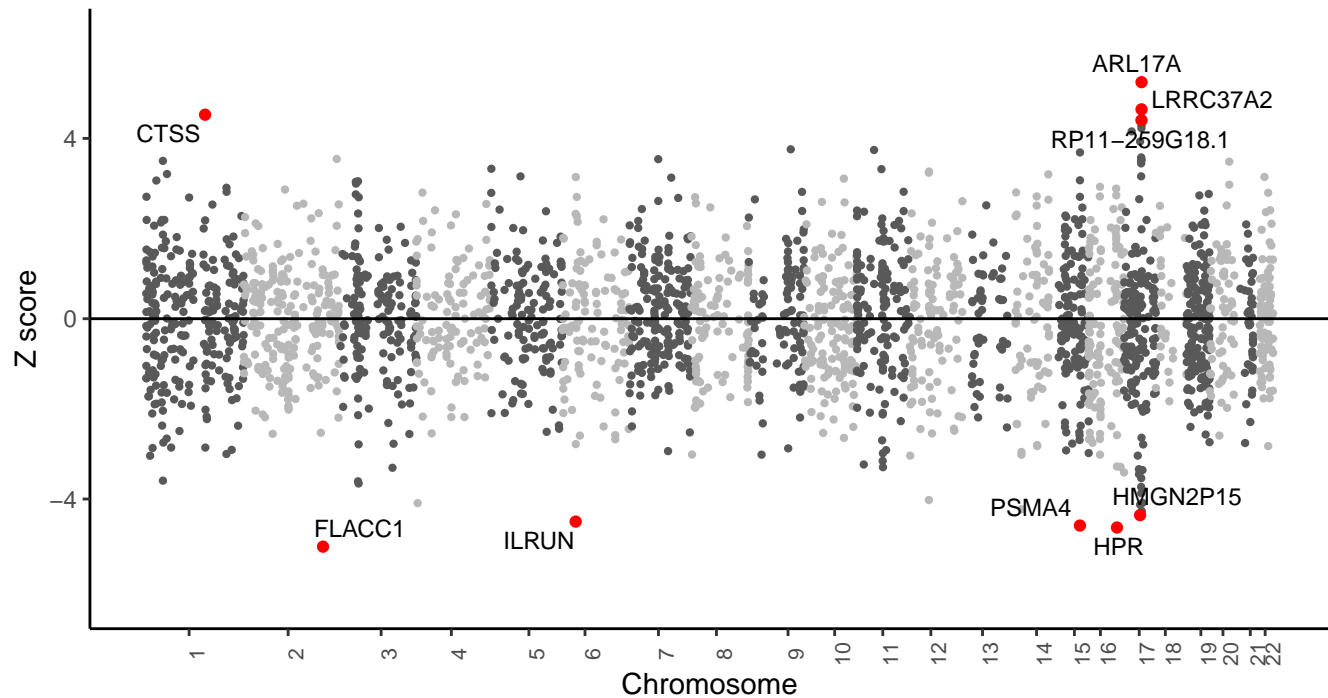

# Longevity\_Brain\_Spinal\_cord\_cervical\_c-1

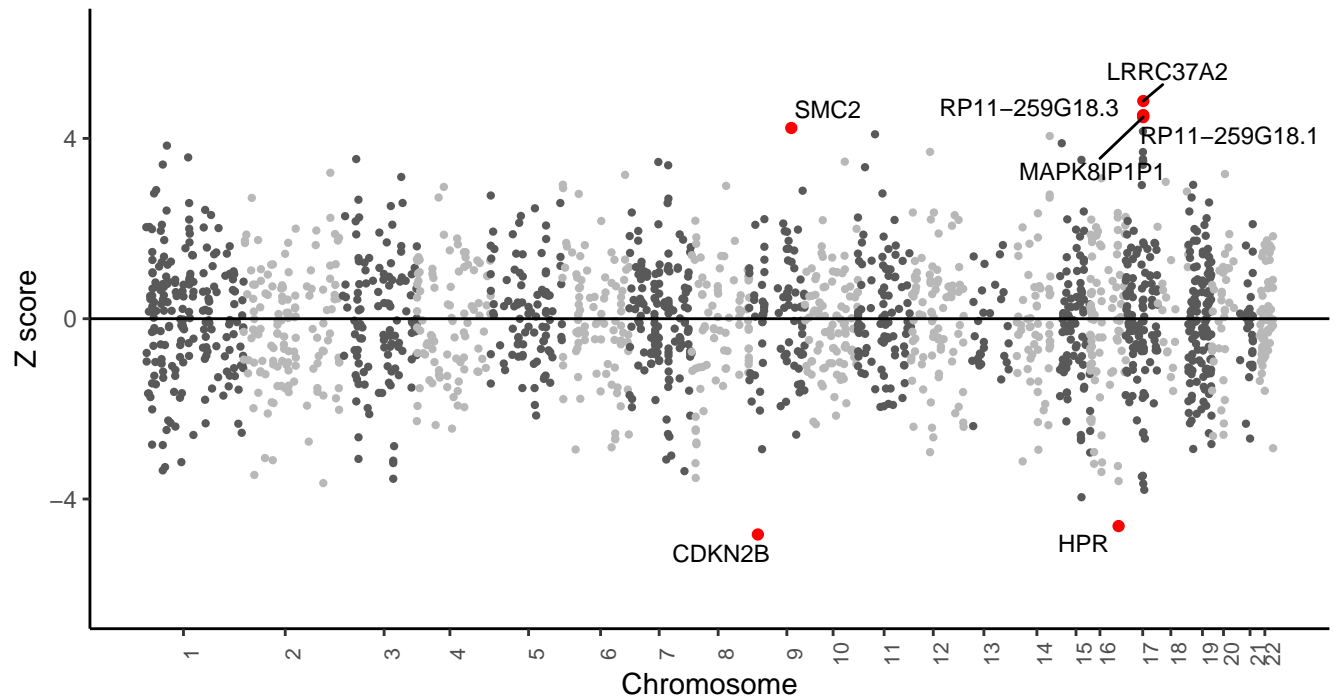

# Longevity\_Brain\_Substantia\_nigra

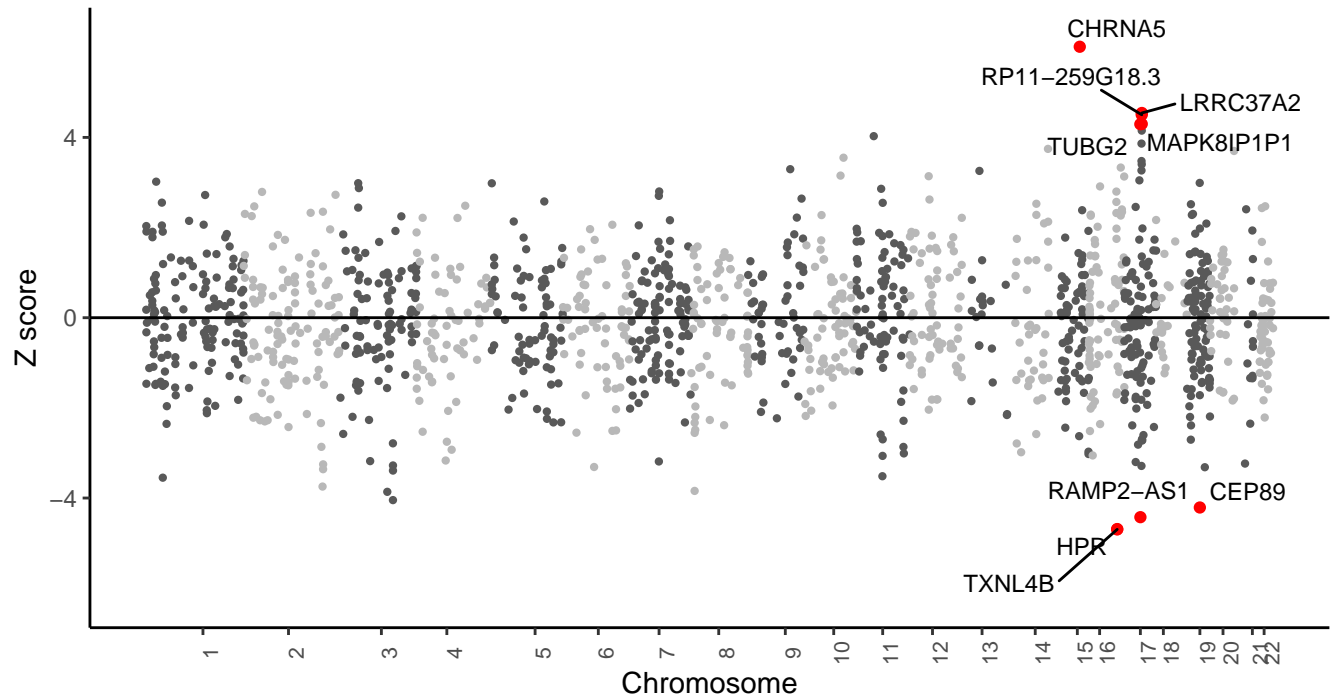

# Longevity\_Fairfax\_CD14

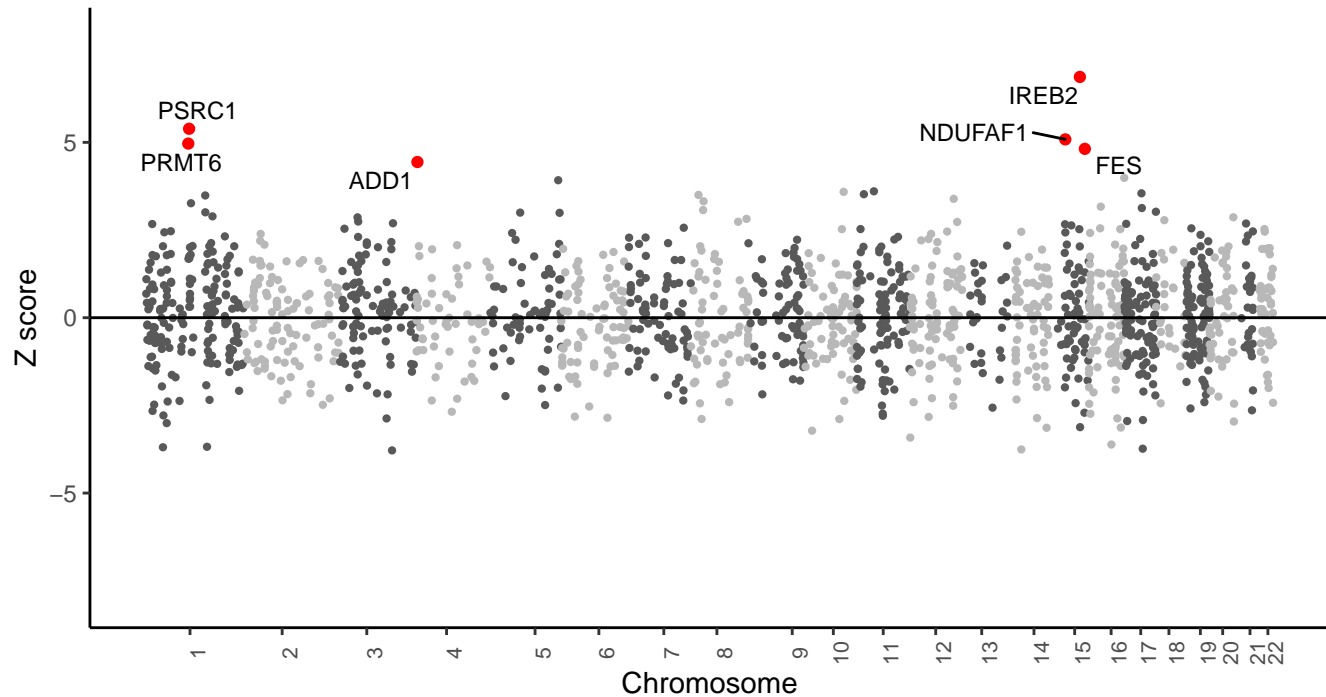

Supplement: Supplementary file [file 1a08eb44b1f2172dd422a54d.pdf]
